# Supplementary material for: Extremely Coherent Microwave Emission from Spin Torque Oscillator Stabilized by Phase Locked Loop
Source: PubMed Central journal article supplement (PMC4676054; doi:10.1038/srep18134), 2015-12-11
Supplement: srep18134-s1.pdf [file srep18134-s1.pdf]

## Supplementary Information

### Circuit design guideline of the STO based PLL

Shingo Tamaru, Hitoshi Kubota\*, Kay Yakushiji, Shinji Yuasa and Akio Fukushima

Spintronics Research Center, National Institute of Advanced Industrial Science and Technology (AIST), Tsukuba, 305-8568, Japan

\*Email: hit-kubota@aist.go.jp

#### PLL circuit design

This supplementary information presents the design information of the STO based PLL test bench built in this work.

Table s1 summarizes the microwave components used in the STO based PLL. The gain and insertion loss values are for 7.344 GHz. The typical signal amplitudes and frequencies in the microwave path are as follows. The raw output signal of the STO used in this work is about 4.5 mV(rms), which corresponds to 0.4  $\mu$ W. This is first attenuated by the HP filter of the BT and then amplified by the LNA1, becoming about 360 mV(rms) at the output of the LNA1. This signal is again attenuated by the PD down to about 170 mV(rms). This is larger than the maximum input level of the LNA2, so the signal waveform at the output of the LNA2 is distorted (clipped with some asymmetry) with an amplitude of about 1.2 V(pp). This signal is first sent to the input of the DC1 and down counted by a factor of 8, becoming 918 MHz, then is further down counted by a factor of 6 in the DC2, eventually becoming 153 MHz before being sent to the PFD circuit.

Figure s1 shows the circuit diagram of the PFD, LF and analog adder blocks (see Figure s1 for the signal labels of U3). The 153 MHz reference signal input into the connector X5 was first sent to an ECL buffer (U1:MC100EP16DG) and then to the R input of the PFD (U3: MC100EP140DG). The differential output signal of the DC2 input into the connectors X1 and X2, which is a STO output signal down counted by 48, was also first sent to an ECL buffer (U2: MC100EP16DG) and then to the FB input of the PFD. The PFD generated a pulse signal, whose width is proportional to the phase difference between the R and FB signals, only to either  $U/\bar{U}$  or  $D/\bar{D}$  terminals depending on whether the phase of the FB signal either leads to or lags behind the R signal. These output signals were sent to an analog subtractor composed of a high speed operational amplifier (U4: THS4271D) to be bundled into a single line,  $V_{PES}$ . This was

fed to a loop filter circuit composed of a high speed operational amplifier with output amplitude limiter (U5: OPA699ID). The loop filter was a standard lag/lead type, whose frequency response was set by R7 (39  $\Omega$ ), R31 (430  $\Omega$ ) and C26 (470 pF). The amplitude of the U5 output was limited to  $\pm 200$  mV in order to prevent  $V_{PES}$  from going beyond the tuning range of  $V_B$  of the STO (the maximum  $V_{PES}$  swing was  $\pm 200$  mV at the U5 output,  $\pm 176$  mV at the U6 output and  $\pm 18.5$  mV at the STO, which is nearly the same as the total tuning range of  $V_B$  as shown in Fig. 2b). The nominal value of  $V_B$  was set by an external voltage source programmed by a host computer, input into the connector X3 and sent to a differential instrumentation amplifier (U7: AMP03GPZ).  $V_B$  and  $V_{PES}$  were added by an analog adder composed of another high speed operational amplifier (U6: THS4031CD). This output signal was output from the connector X3, and injected into the STO through a 200  $\Omega$  resistor embedded in the BT block. Thus the signal was attenuated by a factor of  $11 \Omega / (200 \Omega + 11 \Omega) = 0.052$  at the STO.

Figure s2 shows a photo of the entire PLL test bench. The STO wafer was put under a high frequency probe. The bias magnetic field was generated by a permanent magnet sitting beneath the STO wafer. In the real experiment, the STO performance was first measured as a function of biasing condition, such as magnitude of  $V_B$ , magnitude and direction of  $H_B$ , by a probe station capable of applying a magnetic field along arbitrary directions. The STO showing the best performance on the probe station was contacted by the probe on the PLL test bench, and the magnetic field was fine adjusted by moving the permanent magnet to obtain the same performance as observed on the probe station. The microwave signal generated by the STO propagated through a coax cable with a length of about 30 cm connecting the probe and the BT, passing through the RF path of the BT and was eventually fed to the LNA1. The LNA1 output was split into two paths at the PD, and one of them was further amplified by the LNA2 and down counted by the DC1 and DC2. This signal was sent to the PFD and LF circuit board explained above, and the  $V_B + V_{PES}$  was fed back to the STO through the DC path of the BT. The total signal propagation path length was approximately 1.2 m in the current setup.

### **Table and Figure legends**

Table s1. Microwave components used in the PLL circuit, and the key parameter for each. The gain and insertion loss values are measured at 7.344 GHz.

Figure s1. Circuit diagram of the PFD and LF blocks of the PLL circuit.

Figure s2. Photo of the entire PLL test bench.

| Block in Fig. 4 | Manufacturer and model                      | Key performance parameters                              |
|-----------------|---------------------------------------------|---------------------------------------------------------|
| BT              | Custom                                      | Insertion loss: 2.8 dB<br>$f_c$ : 1.1 GHz               |
| LNA1            | B&Z Technology<br>BZ-00101600-221040-252020 | Gain: 41 dB<br>Bandwidth: 16 GHz                        |
| PD              | Mini-Circuits ZFRSC-183+                    | Insertion loss: 6.3 dB                                  |
| LNA2            | Anritsu AH14149A                            | Gain: 27 dB<br>Bandwidth: 10 GHz                        |
| DC1             | Picosecond pulse labs Model 5650            | Max frequency: 16 GHz<br>Division ratio: 8 (fixed)      |
| DC2             | On Semiconductor MC100EP016                 | Max frequency: >1 GHz<br>Division ratio: 6 (programmed) |

**Table s1 Kubota et al.**

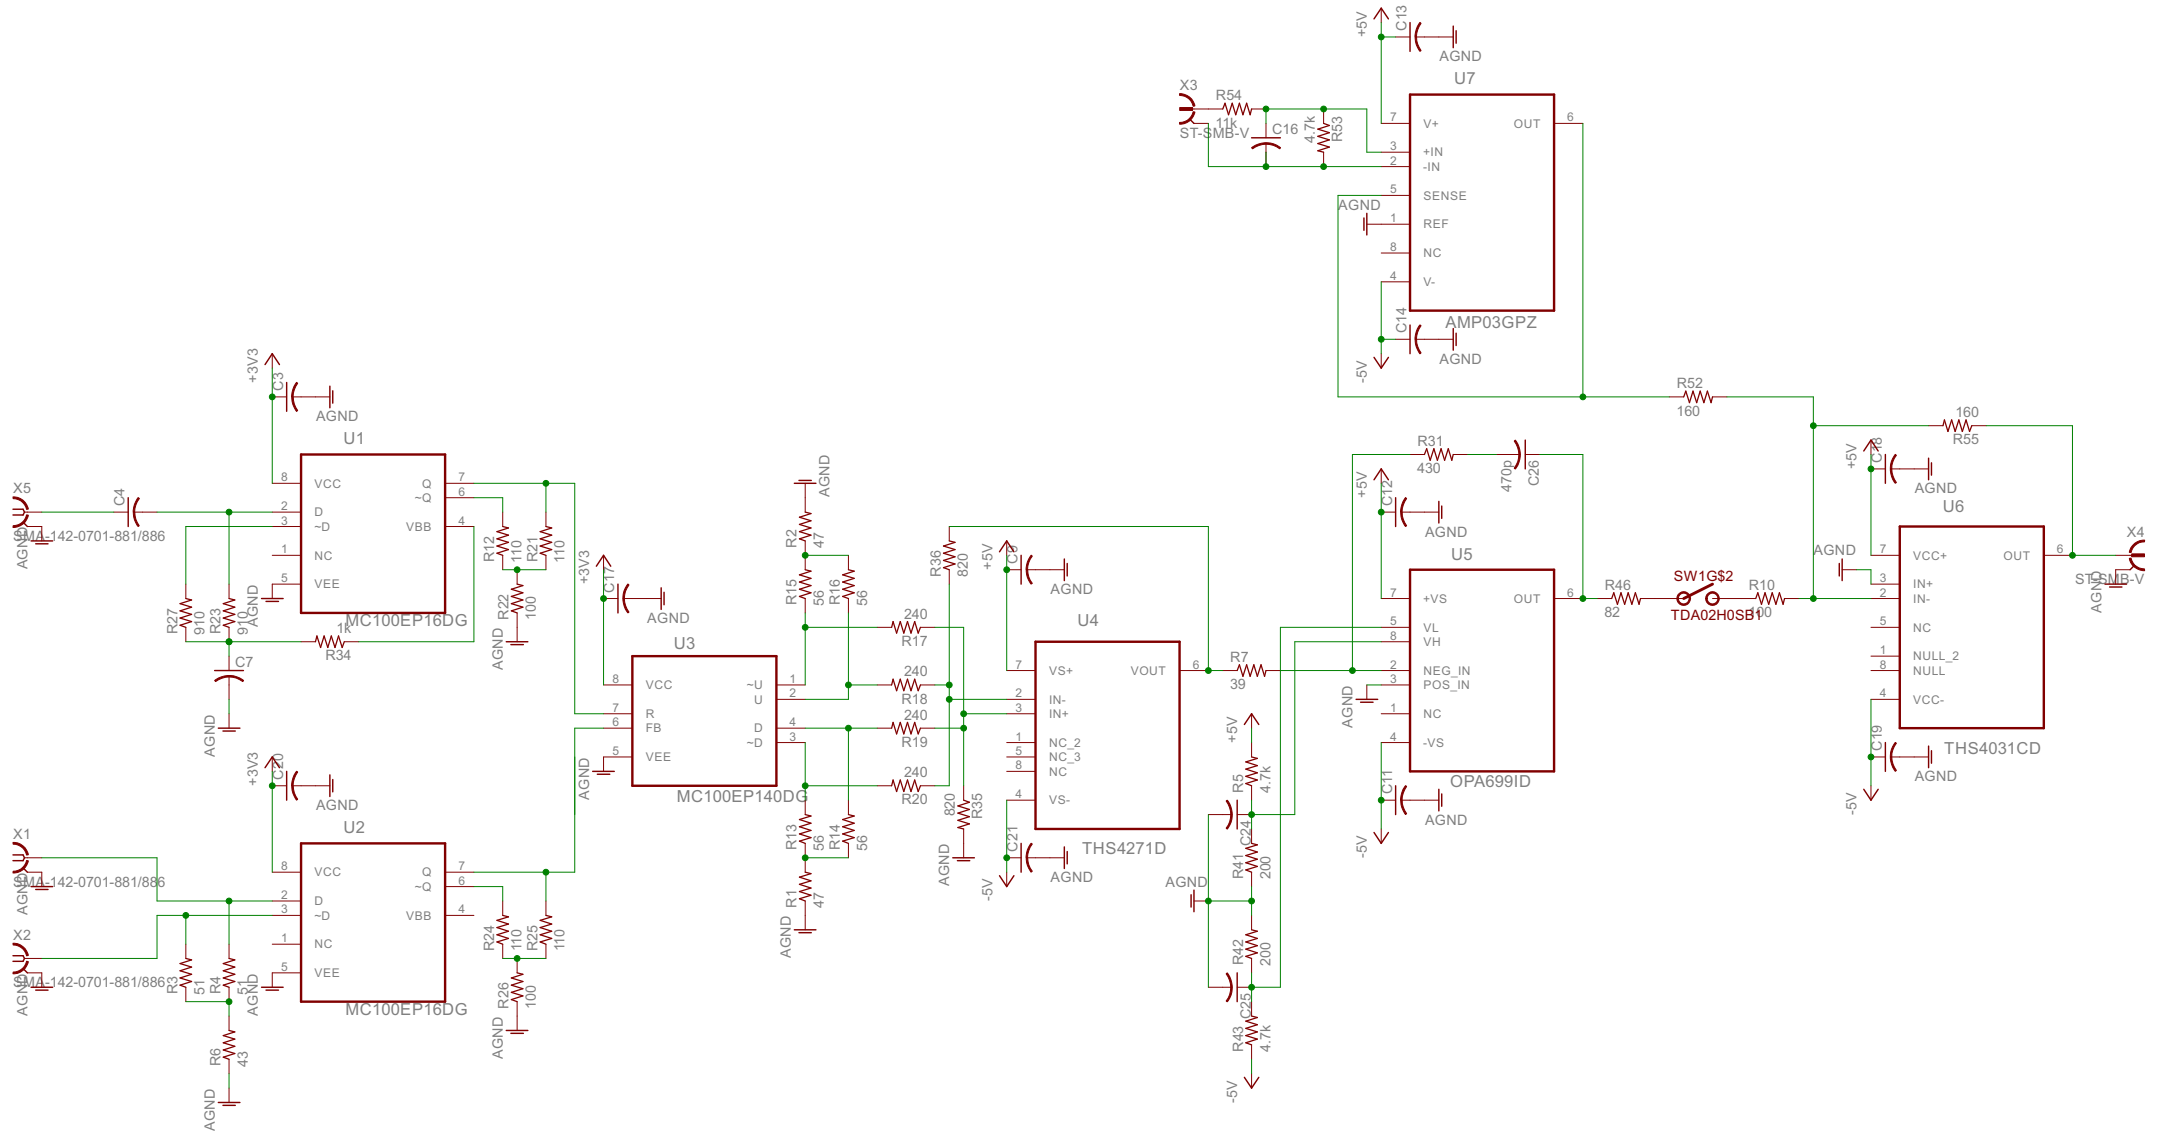

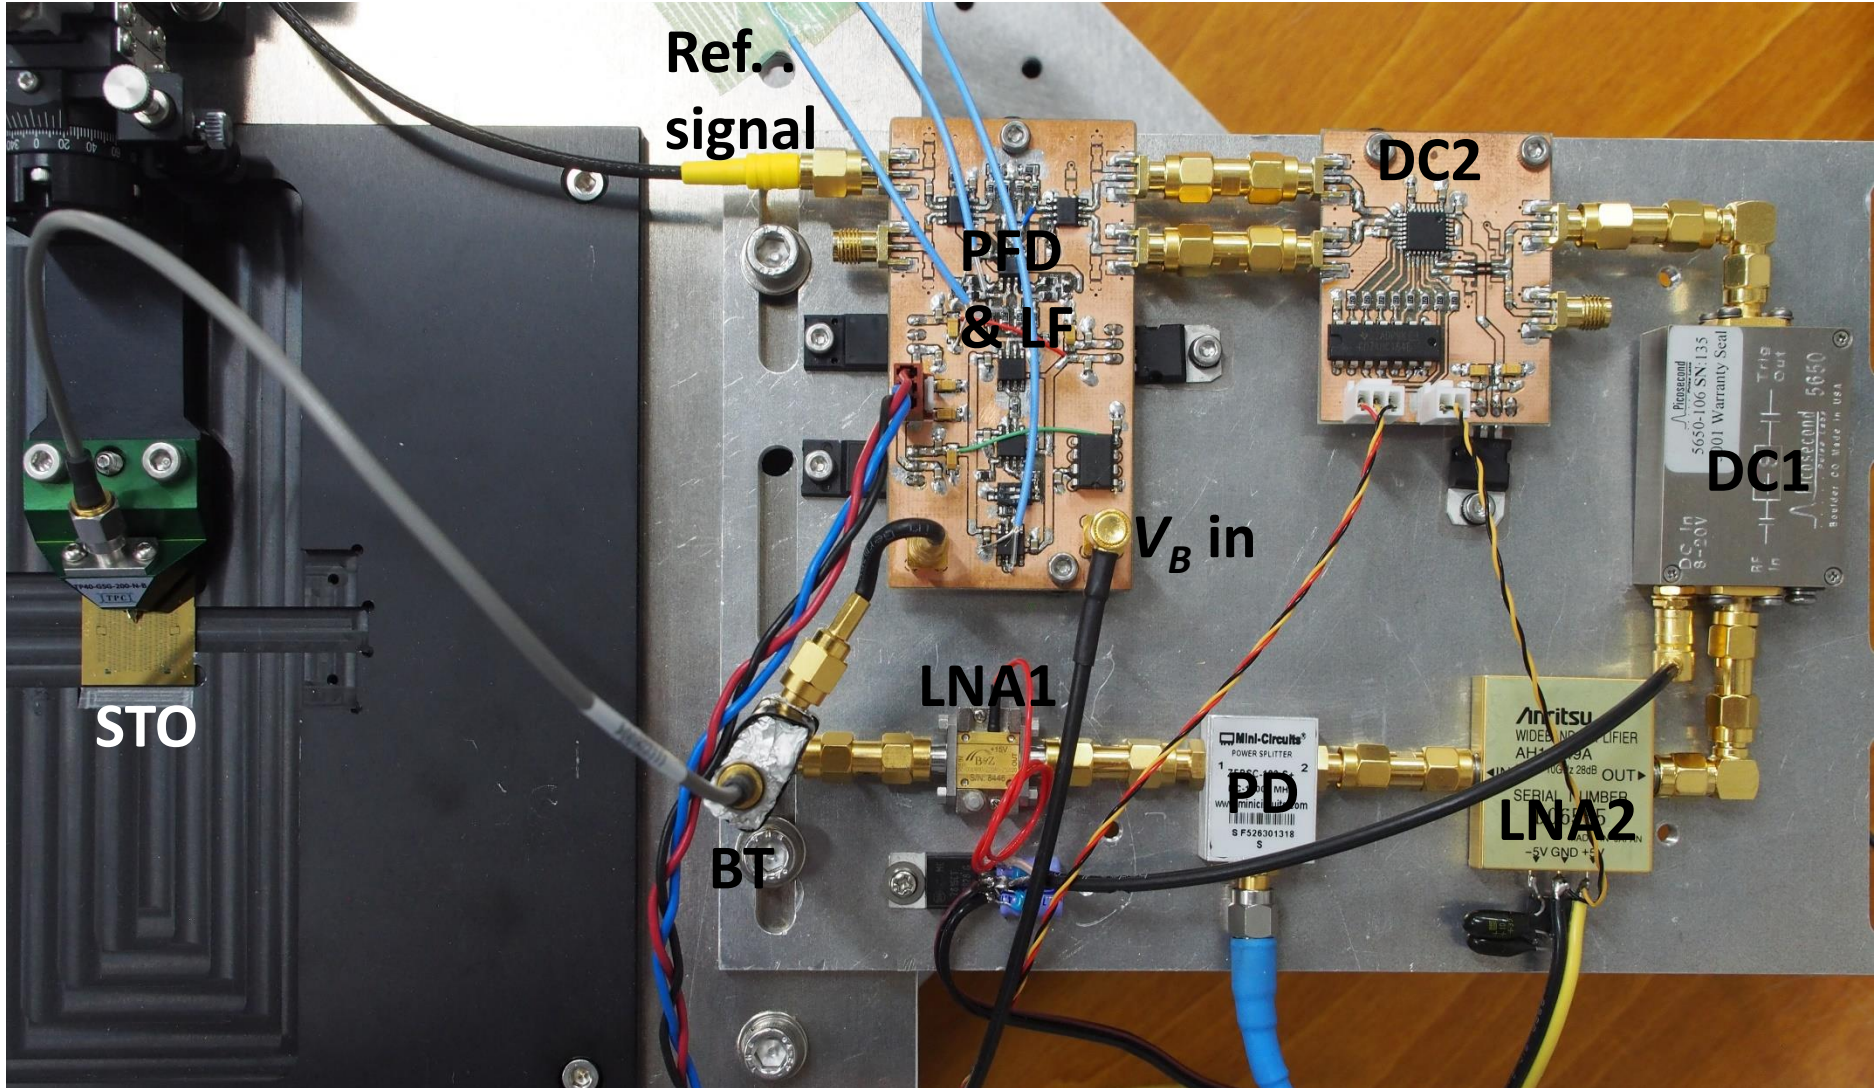

Figure s2 Kubota et al.
